# Supplementary material
Source: publisher figshare collection journal article supplement (https://acs.figshare.com/ndownloader/files/3607740)
Supplement: Supplementary file 1 [file 3607740]

1

## 2

3

4

6

7

8

9

10

11

12

13

14

## Table of Contents

15 **Figure S1.** DNA sequencing of the *E. coli* WT-*ppa* gene and mutant *ppa* gene

16 **Figure S2.** CD spectra of the PP and PPC.

17 **Figure S3.** <sup>1</sup>H NMR spectrum and GPC trace of the pyridyl disulfide-functionalized  
18 pHEMA.

19 **Figure S4.** The influence of 8 mM cysteine on the PPi hydrolysis activity of the PP  
20 and PPC.

21 **Figure S5.** The influence of 8 mM DTT on the PPi hydrolysis activity of the PP and  
22 PPC.

23 **Table S1.** Metal ion selectivity of the PP and PPC.

24 **Table S2.** The effect of pHEMA with different molecular weights on PPC activity.

25 **Table S3.** Michaelis-Menten parameters of sodium pyrophosphate hydrolysis  
26 catalyzed by PPC, the conjugated products and reduced products.

27

WT-*ppa* : ATGAGAGGATCGCATCACCATCACCATCACGGATCCAGCTTACTCAACGTCCCTGCGGGTAAAGATCTGCCGGAAGACAT  
 K148C-*ppa* : ATGAGAGGATCGCATCACCATCACCATCACGGATCCAGCTTACTCAACGTCCCTGCGGGTAAAGATCTGCCGGAAGACAT  
  
 WT-*ppa* : CTACGTTGTTATTGAGATCCCGGCTAACGCAGATCCGATCAAATACGAAATCGACAAAGAGAGCGGCGCACTGTTCTGTTG  
 K148C-*ppa* : CTACGTTGTTATTGAGATCCCGGCTAACGCAGATCCGATCAAATACGAAATCGACAAAGAGAGCGGCGCACTGTTCTGTTG  
  
 WT-*ppa* : ACCGCTTCATGTCCACCGCGATGTTCTATCCATGCAACTACGGTTACATCAACCACACCTGTCTCTGGACGGTGACCCG  
 K148C-*ppa* : ACCGCTTCATGTCCACCGCGATGTTCTATCCATGCAACTACGGTTACATCAACCACACCTGTCTCTGGACGGTGACCCG  
  
 WT-*ppa* : GTTGACGTACTGGTCCCAACTCCGTACCCGCTGCAGCCGGGTTCTGTGATCCGTTGCCGTCGGTTGGCGTTCTGAAAAAT  
 K148C-*ppa* : GTTGACGTACTGGTCCCAACTCCGTACCCGCTGCAGCCGGGTTCTGTGATCCGTTGCCGTCGGTTGGCGTTCTGAAAAAT  
  
 WT-*ppa* : GACCGACGAAGCCGGTGAAGATGCGAACTGGTTGCGGTTCCGCACAGCAAGCTGAGCAAAGAATACGATCACATTAAAG  
 K148C-*ppa* : GACCGACGAAGCCGGTGAAGATGCGAACTGGTTGCGGTTCCGCACAGCAAGCTGAGCAAAGAATACGATCACATTAAAG  
  
 WT-*ppa* : ACGTTAACGATCTGCCTGAAGTGTGAAAGCGCAAAATCGCTCACTTCTTCGAGCACTACAAAGACCTCGAAAAAGGTAAG  
 K148C-*ppa* : ACGTTAACGATCTGCCTGAAGTGTGAAAGCGCAAAATCGCTCACTTCTTCGAGCACTACAAAGACCTCGAAAAAGGTTGC  
  
 WT-*ppa* : TGGGTGAAAGTTGAAGGTTGGGAAAAACGAGAAGCCGCTAAAGCTGAAATCGTTGCCTCCTTCGAGCGCGCAAAGAATAA  
 K148C-*ppa* : TGGGTGAAAGTTGAAGGTTGGGAAAAACGAGAAGCCGCTAAAGCTGAAATCGTTGCCTCCTTCGAGCGCGCAAAGAATAA  
  
 WT-*ppa* : ATAA  
 K148C-*ppa* : ATAA

28

29 **Figure S1.** DNA sequencing results of the *E. coli* WT-*ppa* gene and mutant *ppa* gene.  
 30 (nucleotides in the frame represent mutations).

31 **Table S1.** Metal ion selectivity of the PP and PPC.

| Metal ions       | Relative activity (%) |               |
|------------------|-----------------------|---------------|
|                  | PP                    | PPC           |
| Mg <sup>2+</sup> | 100.00 ± 2.17         | 100.00 ± 3.28 |
| Mn <sup>2+</sup> | 4.75 ± 1.55           | 0.47 ± 1.16   |
| Co <sup>2+</sup> | 0.76 ± 1.63           | 0.87 ± 0.64   |
| Zn <sup>2+</sup> | 0.39 ± 1.12           | 0.86 ± 1.04   |
| Ca <sup>2+</sup> | 2.91 ± 2.06           | 2.78 ± 1.86   |
| Ni <sup>2+</sup> | 0.63 ± 0.98           | 0.09 ± 0.77   |
| Cu <sup>2+</sup> | 1.00 ± 1.26           | 0.06 ± 0.75   |

32

33

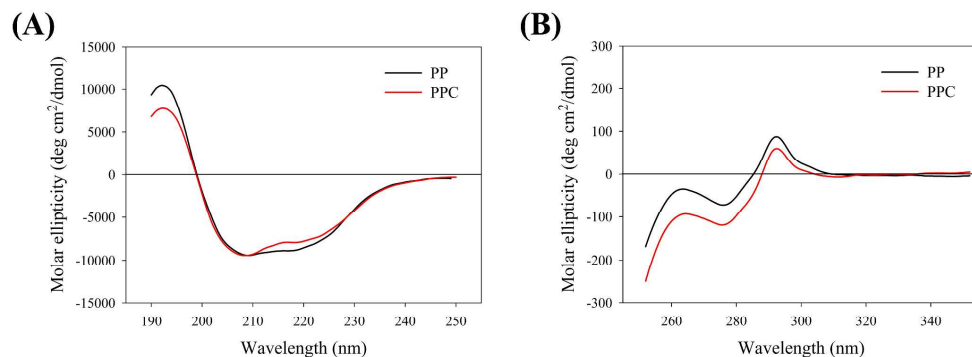

**Figure S2.** CD spectra in the near ultraviolet region (A) and far ultraviolet region (B) of the PP and PPC.

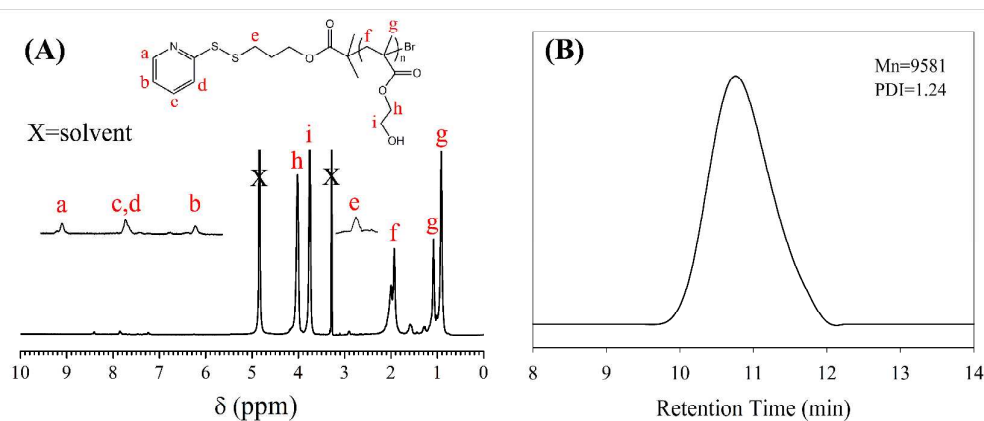

**Figure S3.**  $^1\text{H}$  NMR spectrum (A) (in  $\text{CD}_3\text{OD}$ ) and GPC trace (B) of the pyridyl disulfide-functionalized pHEMA.

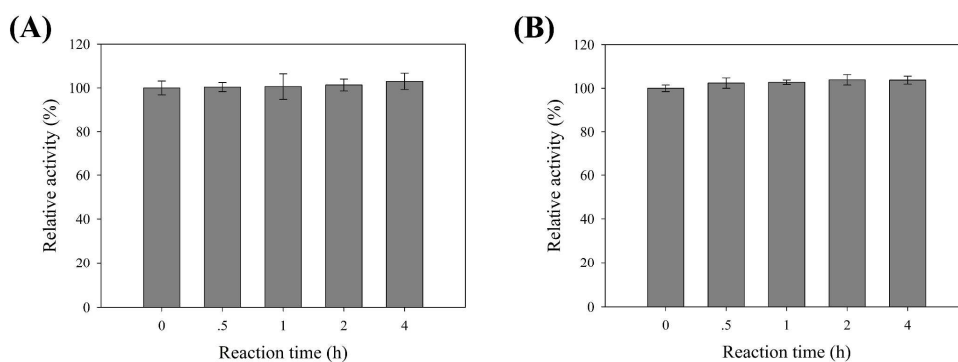

**Figure S4.** The influence of 8 mM cysteine on the PPi hydrolysis activity of the PP (A) and PPC (B). Here, a relative activity of 100% corresponds to the activity of PP and PPC without treatment respectively. Each column represents the mean of separate

44 experiments with bar as SE (n = 3).

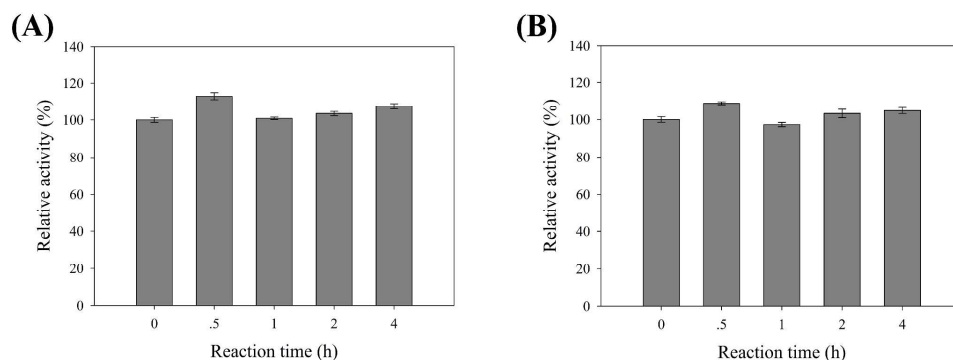

45

46 **Figure S5.** The influence of 8 mM DTT on the PPi hydrolysis activity of the PP (A)  
 47 and PPC (B). Here, a relative activity of 100% corresponds to the activity of PP and  
 48 PPC without treatment respectively. Each column represents the mean of separate  
 49 experiments with bar as SE (n = 3).

50 **Table S2.** The effect of pHEMA with different molecular weights on PPC activity.  
 51 The relative activity of 100 corresponds to the activity of the PPC without treatment.

| Relative activity (%)   | PPC         | PPC-pHEMA | Reduced<br>PPC-pHEMA |
|-------------------------|-------------|-----------|----------------------|
| PPC-pHEMA1 <sup>a</sup> | 100.00±1.31 | 0.37±0.01 | 102.64±1.85          |
| PPC-pHEMA2 <sup>b</sup> | 100.00±1.09 | 0.33±0.02 | 101.08±0.64          |

52 <sup>a</sup> pHEMA1:  $M_{n,HNMR}=8019$ , PDI=1.24; <sup>b</sup> pHEMA2:  $M_{n,HNMR}=25049$ , PDI=1.31.

53 **Table S3.** Michaelis-Menten parameters of sodium pyrophosphate hydrolysis  
 54 catalyzed by PPC, the conjugated products and reduced products.

| Michaelis-Menten<br>parameters                     | PPC   | PPC-PCMB | Reduced<br>PPC-PCMB | PPC-pHEMA | Reduced<br>PPC-pHEMA |
|----------------------------------------------------|-------|----------|---------------------|-----------|----------------------|
| $K_M$ (mM)                                         | 1.08  | 1.10     | 1.12                | 0.90      | 1.06                 |
| $k_{cat}$ (s <sup>-1</sup> )                       | 377.7 | 68.3     | 335.4               | 10.4      | 329.4                |
| $k_{cat}/K_M$ (mM <sup>-1</sup> ·s <sup>-1</sup> ) | 351.1 | 62.3     | 300.0               | 11.6      | 312.1                |

55
